# Supplementary material
Source: PubMed Central journal article supplement (PMC2696148)
Supplement: 90391.2008_2.pdf [file 90391.2008_2.pdf]

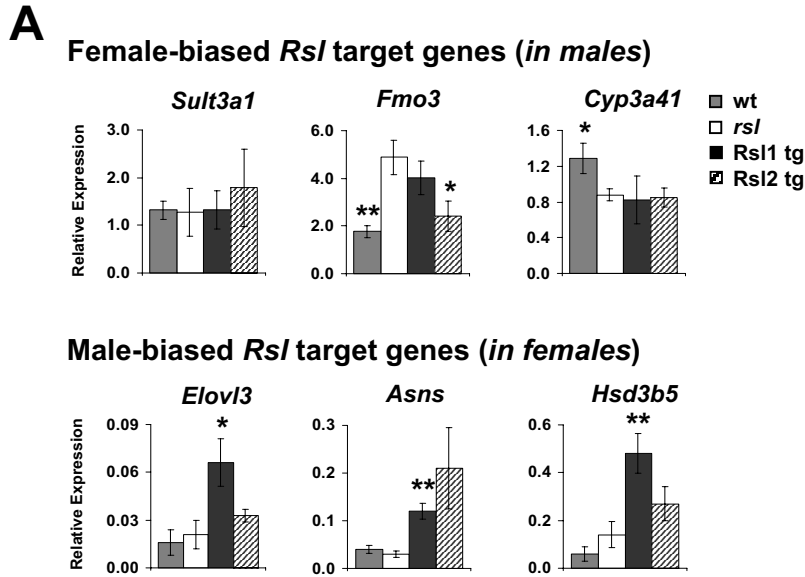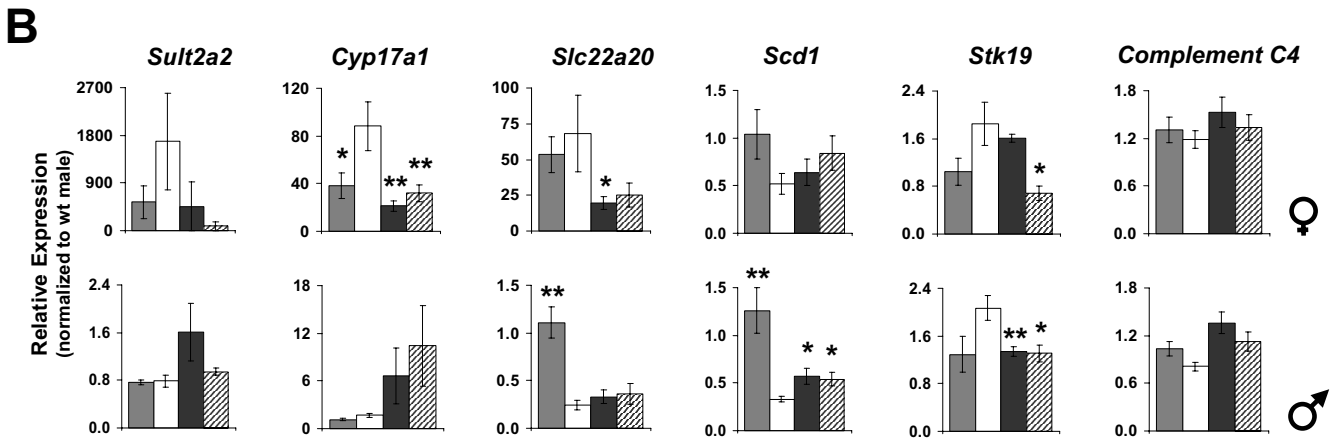

Supplemental Figure S2. Real time Q-RT-PCR validation of gene expression patterns identified by microarray. A) Sexually dimorphic *Rsl*-responsive genes. Results complement those shown in Figure 3. B) *Sult2a2*, *Cyp17a1* and *Slc22a20* are female-predominant in wt mice. *Scd1*, *Stk19* and *Complement C4* are not sexually dimorphic. In previous experiments, *Stk19* expression was modestly responsive to *Rsl1/2* (unpublished observation) and *Complement C4* was non-responsive (20, 40). Bars represent the mean  $\pm$  SEM. Asterisks indicate mice that differ from *rsl*, \*  $p < 0.05$  and \*\*  $p < 0.01$ . At least 4 mice per sex and genotype were assayed independently.
