# Supplementary material
Source: PubMed Central journal article supplement (PMC2696148)
Supplement: 90391.2008_3.pdf [file 90391.2008_3.pdf]

Supplemental Table S1. *Summary of mice used for liver gene expression profiling.*

|      | wt                                              | <i>rsl</i>                                      | Rsl1 Tg                                         | Rsl2 Tg                                          |
|------|-------------------------------------------------|-------------------------------------------------|-------------------------------------------------|--------------------------------------------------|
| Male | (1)<br>A: ( <i>n</i> = 5)<br>B: ( <i>n</i> = 5) | (3)<br>A: ( <i>n</i> = 5)<br>B: ( <i>n</i> = 5) | (5)<br>A: ( <i>n</i> = 3)<br>B: ( <i>n</i> = 7) | (7)<br>A: ( <i>n</i> = 5)<br>B: ( <i>n</i> = 5)  |
|      | Female                                          | (2)<br>A: ( <i>n</i> = 5)<br>B: ( <i>n</i> = 5) | (4)<br>A: ( <i>n</i> = 5)<br>B: ( <i>n</i> = 5) | (6)<br>A: ( <i>n</i> = 10)<br>B: ( <i>n</i> = 7) |

Eight groups of liver RNA were created to identify gene expression patterns that differ by sex (e.g. (1) x (2)) and Rsl status (e.g. (1) x (3), (1) x (5), (1) x (7), etc.). Duplicate pools (A and B) were analyzed and, for the transgenic mice, each pool was derived from a separate transgenic line.
