# Supplementary material
Source: PubMed Central journal article supplement (PMC2696148)
Supplement: 90391.2008_4.pdf [file 90391.2008_4.pdf]

Supplemental Table S2. Probesets inverted in sex-specificity in *rs/* mice.

| Gene                    | Accession Number | Expression Ratio (average) |                               |             |             |
|-------------------------|------------------|----------------------------|-------------------------------|-------------|-------------|
|                         |                  | M-wt / F-wt                | M- <i>rs/</i> / F- <i>rs/</i> | M-R1 / F-R1 | M-R2 / F-R2 |
| <i>Ccdc25</i>           | BC025545         | 1.65                       | 0.37                          | 0.67        | 1.16        |
| <i>Hmgcs1</i>           | BB705380         | 1.51                       | 0.46                          | 0.90        | 0.96        |
| <i>Hmgcs1</i>           | BB705380         | 1.39                       | 0.53                          | 0.92        | 1.00        |
| <i>Rdh11</i>            | AB030503         | 1.82                       | 0.53                          | 0.90        | 0.79        |
| <i>Hmgcs1</i>           | BB705380         | 1.35                       | 0.54                          | 0.97        | 0.92        |
| <i>Fmn1</i>             | BB164513         | 1.62                       | 0.57                          | 1.01        | 0.67        |
| <i>Mod1</i>             | BC011081         | 1.53                       | 0.59                          | 0.80        | 0.70        |
| <i>Cyp51</i>            | NM_020010        | 1.50                       | 0.63                          | 1.01        | 0.89        |
| <i>Idi1</i>             | BC004801         | 1.31                       | 0.64                          | 1.00        | 0.98        |
| <i>Cyp51</i>            | NM_020010        | 1.35                       | 0.64                          | 1.16        | 0.99        |
| <i>Sdpr</i>             | BE197945         | 1.39                       | 0.64                          | 0.75        | 0.86        |
| <i>ATP6v1h (intron)</i> | BM207373         | 1.49                       | 0.66                          | 0.98        | 0.91        |
| <i>Ablim3 (intron)</i>  | BB667786         | 2.03                       | 0.67                          | 1.10        | 1.31        |
| <i>Pltp</i>             | AI591480         | 1.66                       | 0.67                          | 0.74        | 0.84        |
| <i>Idi1</i>             | BC004801         | 1.38                       | 0.72                          | 0.90        | 0.86        |
| <i>Utrn</i>             | AI661876         | 1.34                       | 0.73                          | 0.84        | 1.36        |
| <i>Akap2</i>            | BC003735         | 1.29                       | 0.76                          | 0.87        | 0.95        |
| <i>Pxmp4</i>            | AW495885         | 1.43                       | 0.76                          | 0.84        | 0.87        |
| <i>Figf</i>             | NM_021716        | 1.47                       | 0.76                          | 0.71        | 0.73        |
| <i>Kif1b</i>            | AV104668         | 1.34                       | 0.76                          | 0.91        | 0.91        |
| <i>Chmp4c</i>           | BB028318         | 0.80                       | 1.35                          | 1.06        | 0.95        |
| <i>1700021K10Rik</i>    | BB611374         | 0.77                       | 1.32                          | 1.11        | 1.18        |
| <i>C1qtnf9</i>          | AV376830         | 0.72                       | 1.31                          | 0.99        | 1.12        |
| <i>Zbtb20</i>           | BB087247         | 0.76                       | 1.30                          | 1.01        | 1.14        |

Shown are the genes that appear inverted in their sex-specific expression in *rs/* relative to wt mice. On the top are genes that are male-biased in wt mice and at the bottom are those that are female-biased. For comparison, the male/female expression ratios are also shown for the Rsl1 (R1) and Rsl2 (R2) tg mice. In general, these genes are less sex-biased in the tg mice than in either parental strain.
