# Supplementary material
Source: PubMed Central journal article supplement (PMC2696148)
Supplement: 90391.2008_5.pdf [file 90391.2008_5.pdf]

Supplemental Table S3. Genes that are not sex-biased, yet higher in wt males than *rsI* males.

| Gene                 | Accession Number | Expression Ratio (average) |             |                      |                      |
|----------------------|------------------|----------------------------|-------------|----------------------|----------------------|
|                      |                  | M-wt / F-wt                | M-PL / M-wt | M-R1 / M- <i>rsI</i> | M-R2 / M- <i>rsI</i> |
| <b><i>Trim34</i></b> | <b>BM241342</b>  | <b>0.97</b>                | <b>0.10</b> | <b>2.86</b>          | <b>2.63</b>          |
| <b><i>Trim30</i></b> | <b>AF220142</b>  | <b>0.98</b>                | <b>0.19</b> | <b>1.96</b>          | <b>1.89</b>          |
| <i>ATP11a</i>        | AV378604         | 1.09                       | 0.31        | 2.56                 | 5.26                 |
| <b><i>Gvin1</i></b>  | <b>BM243571</b>  | <b>1.18</b>                | <b>0.32</b> | <b>1.61</b>          | <b>2.78</b>          |
| <u><i>CD36</i></u>   | BB534670         | 0.99                       | 0.38        | 1.32                 | 1.85                 |
| <u><i>Mvd</i></u>    | NM_138656        | 1.10                       | 0.41        | 1.59                 | 1.67                 |
| <i>Paqr9</i>         | AV103696         | 1.07                       | 0.43        | 1.32                 | 1.54                 |
| <i>Camk1d</i>        | BG071931         | 1.22                       | 0.43        | 1.39                 | 1.59                 |
| <u><i>Pmvk</i></u>   | BI713896         | 1.23                       | 0.43        | 1.41                 | 1.56                 |
| <i>Cda</i>           | AK008793         | 0.93                       | 0.45        | 1.37                 | 1.72                 |
| <i>Slc17a1</i>       | NM_009198        | 0.96                       | 0.47        | 1.47                 | 1.67                 |
| <i>Fdft1</i>         | NM_010191        | 1.09                       | 0.48        | 1.25                 | 1.33                 |
| <u><i>Sqle</i></u>   | NM_009270        | 1.04                       | 0.48        | 1.56                 | 1.92                 |
| <i>Slc4a4</i>        | NM_018760        | 1.08                       | 0.49        | 1.43                 | 1.45                 |
| <i>Pde4b</i>         | BM246564         | 0.91                       | 0.50        | 1.28                 | 1.54                 |
| <i>Avpr1a</i>        | D49729           | 0.94                       | 0.50        | 1.85                 | 2.78                 |

Shown are the 16 non-sexually dimorphic genes that are reduced in expression in *rsI* males ( $\Delta \geq 1.50$  fold) and up-regulated in Rsl1 (R1) and Rsl2 (R2) transgenic males relative to wt. In bold are the genes that are similarly regulated in females (*see Supplemental Table S4*). Underlined are genes involved in lipid homeostasis.
