# Supplementary material
Source: PubMed Central journal article supplement (PMC2696148)
Supplement: 90391.2008_6.pdf [file 90391.2008_6.pdf]

Supplemental Table S4. Genes that are not sex-biased, yet higher in wt females than *rsI* females.

| Gene                 | Accession Number | Expression Ratio (average) |                      |                      |                      |
|----------------------|------------------|----------------------------|----------------------|----------------------|----------------------|
|                      |                  | F-wt / M-wt                | F- <i>rsI</i> / F-wt | F-R1 / F- <i>rsI</i> | F-R2 v F- <i>rsI</i> |
| <b><i>Trim30</i></b> | <b>BM241342</b>  | <b>1.04</b>                | <b>0.11</b>          | <b>4.35</b>          | <b>1.82</b>          |
| <b><i>Trim34</i></b> | <b>AF220142</b>  | <b>1.02</b>                | <b>0.18</b>          | <b>2.56</b>          | <b>1.64</b>          |
| <b><i>Gvin1</i></b>  | <b>BM243571</b>  | <b>0.85</b>                | <b>0.44</b>          | <b>2.04</b>          | <b>1.52</b>          |
| <u><i>Scd1</i></u>   | NM_009127        | 0.87                       | 0.49                 | 1.89                 | 1.96                 |
| <u><i>Ethe1</i></u>  | BC010592         | 0.81                       | 0.53                 | 1.43                 | 1.59                 |
| <b><i>Vinc</i></b>   | <b>AK018202</b>  | <b>1.13</b>                | <b>0.57</b>          | <b>1.69</b>          | <b>1.49</b>          |
| <i>Telo2</i>         | BC011077         | 1.20                       | 0.63                 | 1.52                 | 1.49                 |
| <i>Fbxo6b</i>        | NM_015797        | 0.82                       | 0.65                 | 1.59                 | 1.35                 |
| <i>LOC622307</i>     | BB032759         | 0.94                       | 0.65                 | 1.67                 | 1.54                 |

Shown are the 9 non-sexually dimorphic genes that are reduced in expression in *rsI* females ( $\Delta \geq 1.50$  fold) and up-regulated in Rsl1 (R1) and Rsl2 (R2) transgenic females relative to wt. In bold are the genes similarly regulated in males (*see Supplemental Table S3*). Underlined are genes involved in lipid homeostasis.
