# Supplementary material
Source: PubMed Central journal article supplement (PMC2696148)
Supplement: 90391.2008_7.pdf [file 90391.2008_7.pdf]

Supplemental Table S5. Genes that are not sex-biased, yet down-regulated by Rsl in males.

| Gene                  | Accession Number | Expression Ratio (average) |                      |                      |                      |
|-----------------------|------------------|----------------------------|----------------------|----------------------|----------------------|
|                       |                  | M-wt / F-wt                | M- <i>rsl</i> / M-wt | M-R1 / M- <i>rsl</i> | M-R2 / M- <i>rsl</i> |
| <i>Crym</i>           | NM_016669        | 0.87                       | 4.55                 | 0.62                 | 0.74                 |
| <i>BG074582</i>       | BG074582         | 0.82                       | 2.56                 | 0.73                 | 0.52                 |
| <i>1810055G02Rik</i>  | BC019471         | 1.24                       | 2.50                 | 0.72                 | 0.72                 |
| <i>Dclre1a</i>        | AF241240         | 0.82                       | 2.33                 | 0.65                 | 0.47                 |
| <i>Mafb</i>           | AW412521         | 0.86                       | 2.17                 | 0.63                 | 0.78                 |
| <i>Al663975</i>       | AV380966         | 0.86                       | 2.17                 | 0.80                 | 0.52                 |
| <i>Per1</i>           | AF022992         | 0.82                       | 2.08                 | 0.75                 | 0.70                 |
| <i>Mtrr</i>           | BB757908         | 0.98                       | 2.04                 | 0.77                 | 0.78                 |
| <i>Marveld1</i>       | BB324084         | 0.89                       | 2.00                 | 0.78                 | 0.62                 |
| <i>Kcnk5</i>          | AF319542         | 1.12                       | 2.00                 | 0.56                 | 0.51                 |
| <i>Ak3l1</i>          | NM_009647        | 0.88                       | 1.82                 | 0.73                 | 0.53                 |
| <i>Lrrc28</i>         | BB667531         | 0.99                       | 1.82                 | 0.70                 | 0.68                 |
| <u><i>Angptl4</i></u> | NM_020581        | 1.14                       | 1.75                 | 0.78                 | 0.76                 |
| <i>Akap13</i>         | BM211430         | 1.05                       | 1.75                 | 0.70                 | 0.72                 |
| <i>Ppp1r11</i>        | BB824091         | 0.88                       | 1.69                 | 0.78                 | 0.64                 |
| <i>BC008163</i>       | AU067643         | 0.83                       | 1.69                 | 0.77                 | 0.79                 |
| <i>Plekha8</i>        | BQ031094         | 0.92                       | 1.69                 | 0.76                 | 0.75                 |
| <i>Cys1</i>           | BF466918         | 0.94                       | 1.56                 | 0.80                 | 0.67                 |
| <i>Lactb2</i>         | BG070910         | 0.93                       | 1.52                 | 0.52                 | 0.64                 |
| <i>Hdmcp</i>          | BF531708         | 0.86                       | 1.52                 | 0.79                 | 0.70                 |

Shown are the top 20 non-sexually dimorphic genes that are increased in expression in *rsl* males ( $\Delta \geq 1.50$  fold) and down-regulated in Rsl1 (R1) and Rsl2 (R2) transgenic males relative to wt. Underlined are genes involved in lipid homeostasis.
