# Supplementary material
Source: PubMed Central journal article supplement (PMC2696148)
Supplement: 90391.2008_8.pdf [file 90391.2008_8.pdf]

Supplemental Table S6. Genes that are not sex-biased, yet down-regulated by Rsl in females.

| Gene          | Accession Number | Expression Ratio (average) |                      |                      |                      |
|---------------|------------------|----------------------------|----------------------|----------------------|----------------------|
|               |                  | F-wt / M-wt                | F- <i>rsl</i> / F-wt | F-R1 / F- <i>rsl</i> | F-R2 / F- <i>rsl</i> |
| <i>Cap2</i>   | AV261931         | 1.03                       | 4.55                 | 0.73                 | 1.00                 |
| <i>Alas1</i>  | BM021574         | 0.87                       | 2.33                 | 0.66                 | 0.52                 |
| <i>Fancc</i>  | BB522905         | 0.96                       | 2.17                 | 0.60                 | 0.67                 |
| <i>Zfp259</i> | AK016551         | 0.83                       | 2.04                 | 0.78                 | 0.71                 |
| <i>Col5a2</i> | AV229424         | 1.03                       | 2.04                 | 0.66                 | 1.08                 |
| <i>Phr1</i>   | BM238052         | 0.90                       | 1.69                 | 0.51                 | 0.70                 |
| <i>Gda</i>    | AW911807         | 0.88                       | 1.56                 | 0.61                 | 0.80                 |
| <i>Fzd8</i>   | BB086994         | 1.06                       | 1.54                 | 0.75                 | 0.90                 |

Shown are the 8 non-sexually dimorphic genes that are increased in expression in *rsl* females ( $\Delta \geq 1.50$  fold) and down-regulated in Rsl1 (R1) and Rsl2 (R2) transgenic females relative to wt.
